# Supplementary material
Source: Springer Nature journal article supplement (https://www.springermedizin.de/resource/supplementary/12974_2010_285_MOESM3_ESM.pdf/9601166)

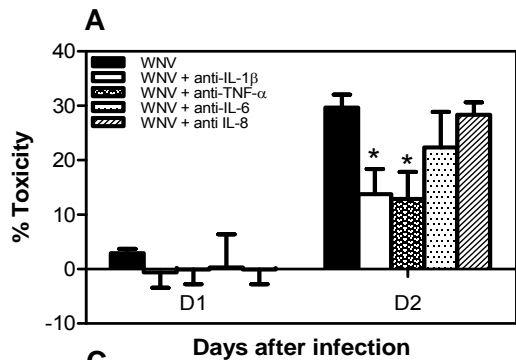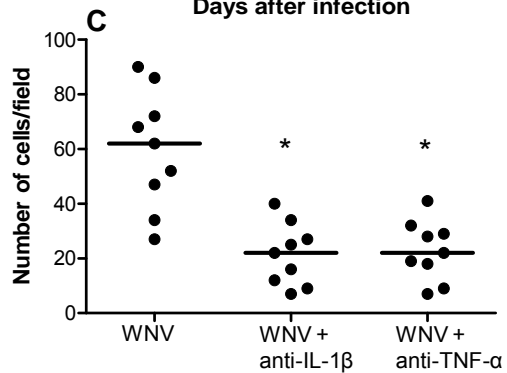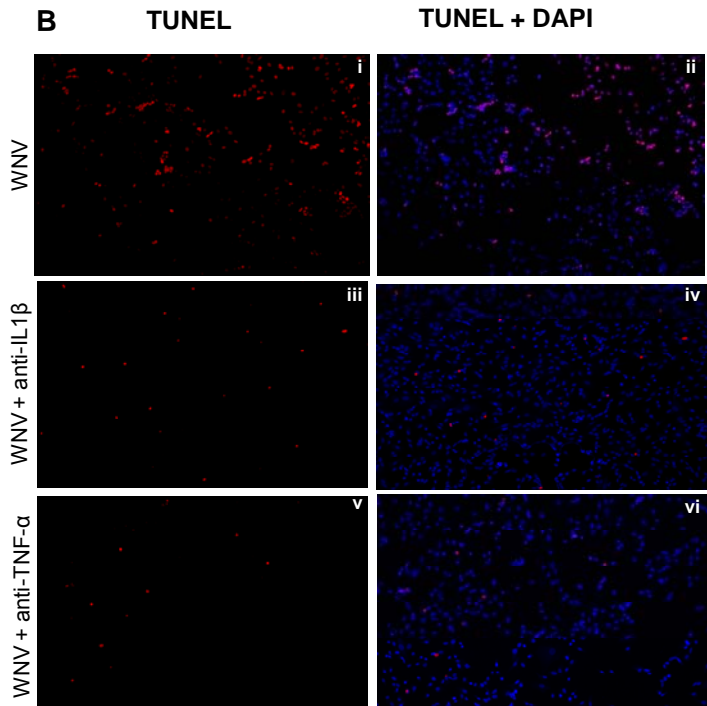

Supplement: MOESM3 [file 9601166]
